# Supplementary material for: Fabrication of a PdCu@SiO2@Cu core–shell–satellite catalyst for the selective hydrogenation of acetylene
Source: Royal Society of Chemistry journal article supplement (doi:10.1039/d3dt03170e), 2023-11-20
Supplement: d3dt03170e1.pdf [file d3dt03170e1.pdf]

## Supporting Information

### **Fabrication of PdCu@SiO<sub>2</sub>@Cu core-shell-satellite catalyst for the selective hydrogenation of acetylene**

Shuang Liu, Shaobo Han, Yong Li and Wenjie Shen\*

State Key Laboratory of Catalysis, Dalian Institute of Chemical Physics, Chinese Academy of  
Sciences, Dalian 116023, China

\* e-mail: shen98@dicp.ac.cn

**Table s1.** Structure of the typical core-shell-satellite architectures.

| Sample                                    | Core size (nm) | Satellite size (nm) | Shell thickness (nm) | Ref.             |
|-------------------------------------------|----------------|---------------------|----------------------|------------------|
| Ag@SiO <sub>2</sub> @TiO <sub>2</sub> @Au | 30-60          | 11 × 40             | 10-15                | 1                |
| Ag@SiO <sub>2</sub> @CeO <sub>2</sub> @Au | 30             | 2-10                | 15-20                | 2                |
| Au@SiO <sub>2</sub> @AgPt                 | 18 × 61        | 2-5                 | 2-3                  | 3                |
| Ag@SiO <sub>2</sub> @Ag                   | 60-80          | 5                   | 35-45                | 4                |
| Ni@SiO <sub>2</sub> @Ni                   | 11.7           | 3-7                 | 11.2                 | 5                |
| Ag@SiO <sub>2</sub> @Pt                   | 12/25/50/100   | 5                   | 8-10                 | 6                |
| Au@pNIPAM@Ag                              | 50             | 6/10/14/34          | ~140                 | 7                |
| Ag@RF@Ag                                  | 45             | ~3-8                | 30                   | 8                |
|                                           | 40             | 8                   | 100                  |                  |
| AuAg@pNIPAM@Ag                            | 64             | 15                  | ~140                 | 9                |
| <b>PdCu@SiO<sub>2</sub>@Cu</b>            | <b>7</b>       | <b>1.4</b>          | <b>8</b>             | <b>This work</b> |

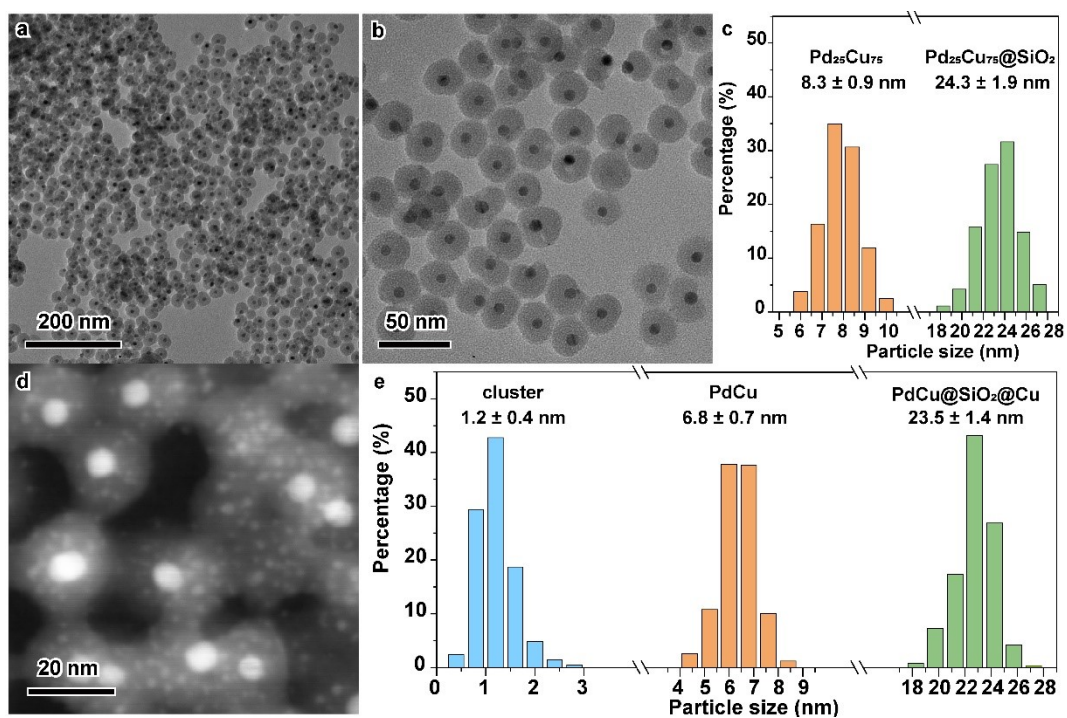

**Figure s1.** TEM/STEM images and particle size distributions of the as-synthesized Pd<sub>25</sub>Cu<sub>75</sub>@SiO<sub>2</sub> core-shell (a-c) and PdCu@SiO<sub>2</sub>@Cu core-shell-satellite (d, e) architectures.

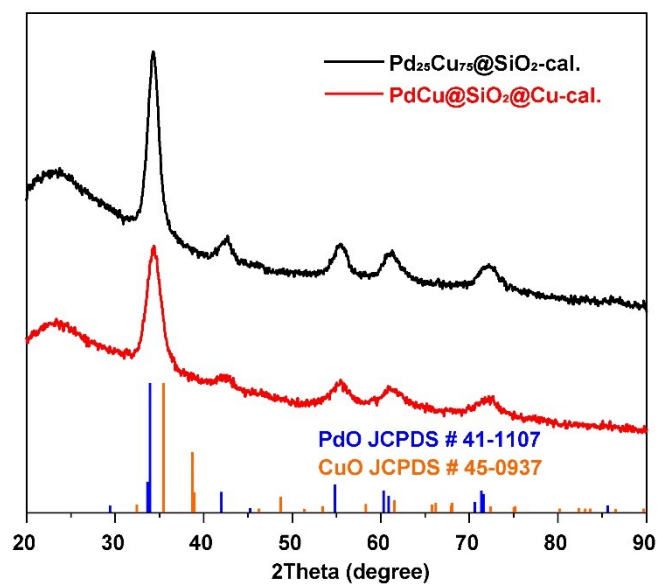

**Figure s2.** XRD patterns of the as-calcined Pd<sub>25</sub>Cu<sub>75</sub>@SiO<sub>2</sub> and PdCu@SiO<sub>2</sub>@Cu samples.

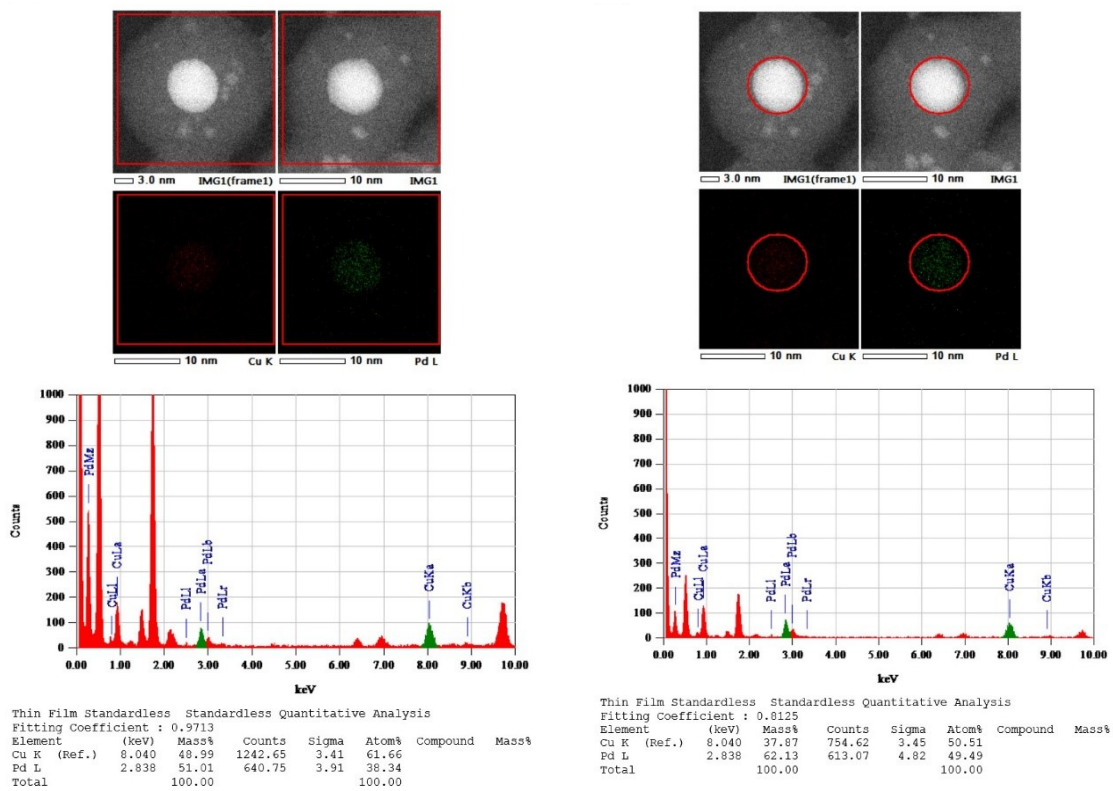

Figure s3. Semi-quantitative analysis of the core-shell-satellite catalyst by EDS.

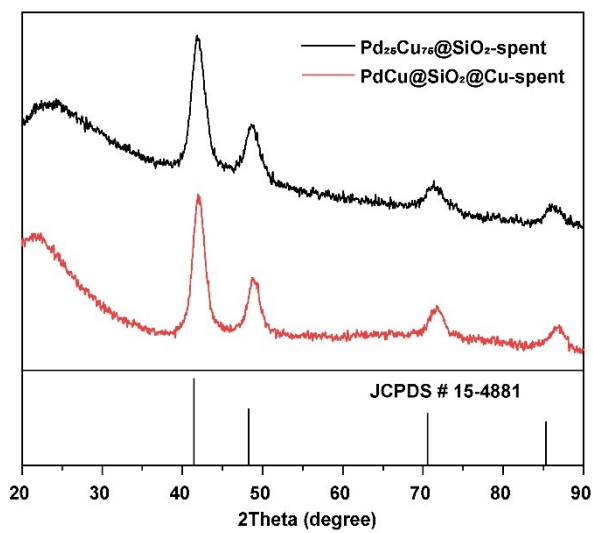

Figure s4. XRD patterns of the spent catalysts.

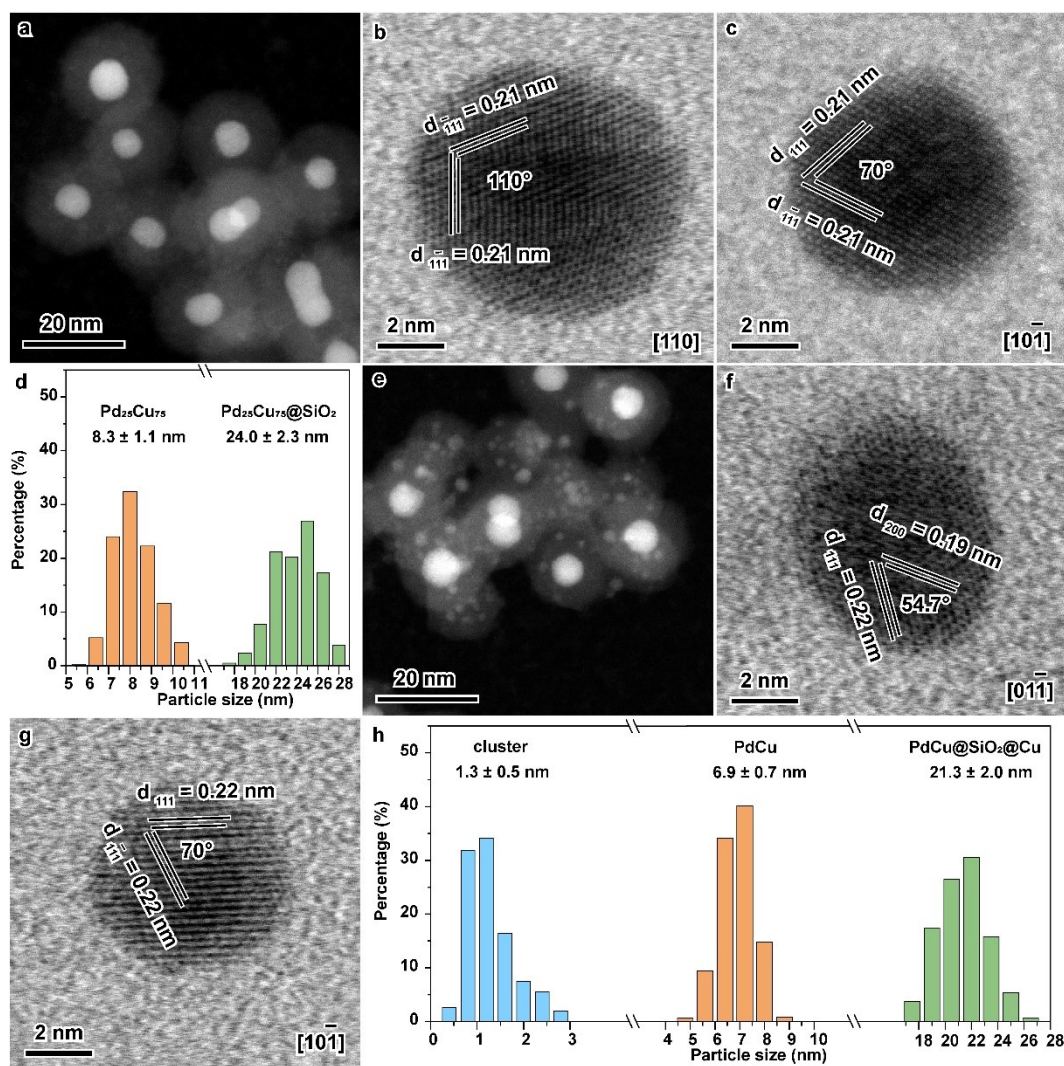

**Figure s5.** HRTEM/STEM images and particle size distributions of the spent  $\text{Pd}_{25}\text{Cu}_{75}@SiO_2$  core-shell (**a-d**) and  $\text{PdCu}@SiO_2@Cu$  core-shell-satellite (**e-h**) catalysts.

**Table s2.** Acetylene hydrogenation over Pd and PdCu catalysts.

| Catalyst (wt.)                                     | Temp. (K)  | Feed gas (vol.%)                                                                                     | Conv. (%) | Ethylene Sel. (%) | Ref.             |
|----------------------------------------------------|------------|------------------------------------------------------------------------------------------------------|-----------|-------------------|------------------|
| 0.11%Pd <sub>1</sub> /ND@G                         | 453        | 1%C <sub>2</sub> H <sub>2</sub> /10%H <sub>2</sub> /20%C <sub>2</sub> H <sub>4</sub> /He             | 100       | >90               | 10               |
| 1.8%Pd <sub>1</sub> /C <sub>3</sub> N <sub>4</sub> | 388        | 0.5%C <sub>2</sub> H <sub>2</sub> /1%H <sub>2</sub> /20%C <sub>2</sub> H <sub>4</sub> /Ar            | 100       | 83                | 11               |
| 1.0%Pd/ZnO                                         | 423        | 2% C <sub>2</sub> H <sub>2</sub> /20%H <sub>2</sub> /He                                              | 100       | 91                | 12               |
| 0.043%Pd <sub>1</sub> /MPNC                        | 383        | 0.5%C <sub>2</sub> H <sub>2</sub> /5%H <sub>2</sub> /50%C <sub>2</sub> H <sub>4</sub> /He            | 85        | 83                | 13               |
| 2.0%Pd/MgAl <sub>2</sub> O <sub>4</sub>            | 363        | 0.5%/5%H <sub>2</sub> /50%C <sub>2</sub> H <sub>4</sub> /He                                          | 100       | 15                | 14               |
| 1.29%PdCu/TiO <sub>2</sub>                         | 373        | 1.5%C <sub>2</sub> H <sub>2</sub> /1.7%H <sub>2</sub> /C <sub>2</sub> H <sub>4</sub>                 | 98        | 78                | 15               |
| 0.05%Pd <sub>0.006</sub> Cu/SiO <sub>2</sub>       | 443        | 1%C <sub>2</sub> H <sub>2</sub> /20%H <sub>2</sub> /20%C <sub>2</sub> H <sub>4</sub> /He             | 100       | 85                | 16               |
| 1.0%PdCu/Al <sub>2</sub> O <sub>3</sub>            | 363        | 0.5%C <sub>2</sub> H <sub>2</sub> /3%/H <sub>2</sub> /Ar                                             | 100       | 95.2              | 17               |
| 0.2%Pd <sub>1</sub> /Cu(111)                       | 393        | 1%C <sub>2</sub> H <sub>2</sub> /20%H <sub>2</sub> /20%C <sub>2</sub> H <sub>4</sub> /N <sub>2</sub> | 100       | 85                | 18               |
| 0.058%PdCu <sub>40</sub> /SiO <sub>2</sub>         | 433        | 1%C <sub>2</sub> H <sub>2</sub> /20%H <sub>2</sub> /20%C <sub>2</sub> H <sub>4</sub> /He             | 100       | 85                | 19               |
| PdCu <sub>15</sub> @C                              | 393        | 0.5%C <sub>2</sub> H <sub>2</sub> /10%H <sub>2</sub> /N <sub>2</sub>                                 | 100       | 91                | 20               |
| 0.09%Pd <sub>1</sub> Cu <sub>1</sub> /ND@G         | 383        | 1%C <sub>2</sub> H <sub>2</sub> /10%H <sub>2</sub> /20%C <sub>2</sub> H <sub>4</sub> /He             | 100       | 92                | 21               |
| <b>9.5 wt.%PdCu@SiO<sub>2</sub>@Cu</b>             | <b>373</b> | <b>1 vol.% C<sub>2</sub>H<sub>2</sub>, 2 vol.% H<sub>2</sub>, He</b>                                 | <b>72</b> | <b>89</b>         | <b>This work</b> |

## Reference

1. M. Liu, X. Jin, S. Li, J.-B. Billeau, T. Peng, H. Li, L. Zhao, Z. Zhang, J. P. Claverie, L. Razzari and J. Zhang, *ACS Appl. Mater. Interfaces*, 2021, **13**, 34714–34723.
2. J. Gu, H. Liu, T. Peng, S. Li, L. Xu, J. Zhang and L. Zhang, *ACS Appl. Nano Mater.*, 2022, **5**, 4972–4982.
3. H. Jia, L. Qiu and J. Wang, *RSC Adv.*, 2015, **5**, 40316–40323.
4. Y. Mao, W. Jiang, S. Wang, M. Liu, S. Xuan, X. Gong and K. C.-F. Leung, *J. Alloys Compd.*, 2016, **680**, 406–414.
5. Z. Li, L. Mo, Y. Kathiraser and S. Kawi, *ACS Catal.*, 2014, **4**, 1526–1536.
6. K. Li, N. J. Hogan, M. J. Kale, N. J. Halas, P. Nordlander and P. Christopher, *Nano Lett.*, 2017, **17**, 3710–3717.
7. C. Alarcón-Fernández, M. Doña, A. Tapia-Fernández, G. Villaverde, M. R. Lopez-Ramirez, J. M. López-Romero and R. Contreras-Caceres, *ACS Appl. Nano Mater.*, 2020, **3**, 8247–8256.
8. P. Yang, Y. Xu, L. Chen, X. Wang, B. Mao, Z. Me, S. Wang, F. Bao and Q. Zhang, *Nano Lett.*, 2015, **15**, 8397–8401.
9. L. Tzounis, M. Doña, J. M. Lopez-Romero, A. Fery and R. Contreras-Caceres, *ACS Appl. Mater. Interfaces*, 2019, **11**, 29360–29372.

10. F. Huang, Y. Deng, Y. Chen, X. Cai, M. Peng, Z. Jia, P. Ren, D. Xiao, X. Wen, N. Wang, H. Liu and D. Ma, *J. Am. Chem. Soc.*, 2018, **140**, 13142–13146.
11. X. Huang, Y. Xia, Y. Cao, X. Zheng, H. Pan, J. Zhu, C. Ma, H. Wang, J. Li, R. You, S. Wei, W. Huang and J. Lu, *Nano Res.*, 2017, **10**, 1302–1312.
12. H. Zhou, X. Yang, L. Li, X. Liu, Y. Huang, X. Pan, A. Wang, J. Li and T. Zhang, *ACS Catal.*, 2016, **6**, 1054–1061.
13. Q. Feng, S. Zhao, Q. Xu, W. Chen, S. Tian, Y. Wang, W. Yan, J. Luo, D. Wang and Y. Li, *Adv. Mater.*, 2019, **31**, 1901024.
14. Q. Feng, S. Zhao, Y. Wang, J. Dong, W. Chen, D. He, D. Wang, J. Yang, Y. Zhu, H. Zhu, L. Gu, Z. Li, Y. Liu, R. Yu, J. Li and Y. Li, *J. Am. Chem. Soc.*, 2017, **139**, 7294–7301.
15. B. Pongthawornsakun, N. Wimonsupakit and J. Panpranot, *J. Chem. Sci.*, 2017, **129**, 1721–1734.
16. G. X. Pei, X. Y. Liu, X. Yang, L. Zhang, A. Wang, L. Li, H. Wang, X. Wang and T. Zhang, *ACS Catal.*, 2017, **7**, 1491–1500.
17. Q. Gao, Z. Yan, W. Zhang, H. S. Pillai, B. Yao, W. Zang, Y. Liu, X. Han, B. Min, H. Zhou, L. Ma, B. Anaclet, S. Zhang, H. Xin, Q. He and H. Zhu, *J. Am. Chem. Soc.*, 2023, **145**, 19961–19968.
18. L. Jiang, K. Liu, S. -F. Hung, L. Zhou, R. Qin, Q. Zhang, P. Liu, L. Gu, H. Chen, G. Fu and N. Zheng, *Nat. Nanotechnol.*, 2020, **15**, 848–853.
19. G. Pei, X. Liu, M. Chai, A. Wang and T. Zhang, *Chin. J. Catal.*, 2017, **38**, 1540–1548.
20. C. Lu, S. Zhou, W. Zhou, C. Zhou, Q. Li, A. Zeng, A. Wang, L. Tan and L. Dong, *Chem. Eng. J.*, 2023, **464**, 142609 .
21. F. Huang, M. Peng, Y. Chen, X. Cai, X. Qin, N. Wang, D. Xiao, L. Jin, G. Wang, X.-D. Wen, H. Liu and D. Ma, *J. Am. Chem. Soc.*, 2022, **144**, 18485–18493.
